# Supplementary material for: Data capture in bioinformatics: requirements and experiences with Pedro
Source: Springer Nature journal article supplement (doi:10.1186/1471-2105-9-183), 2008-04-10

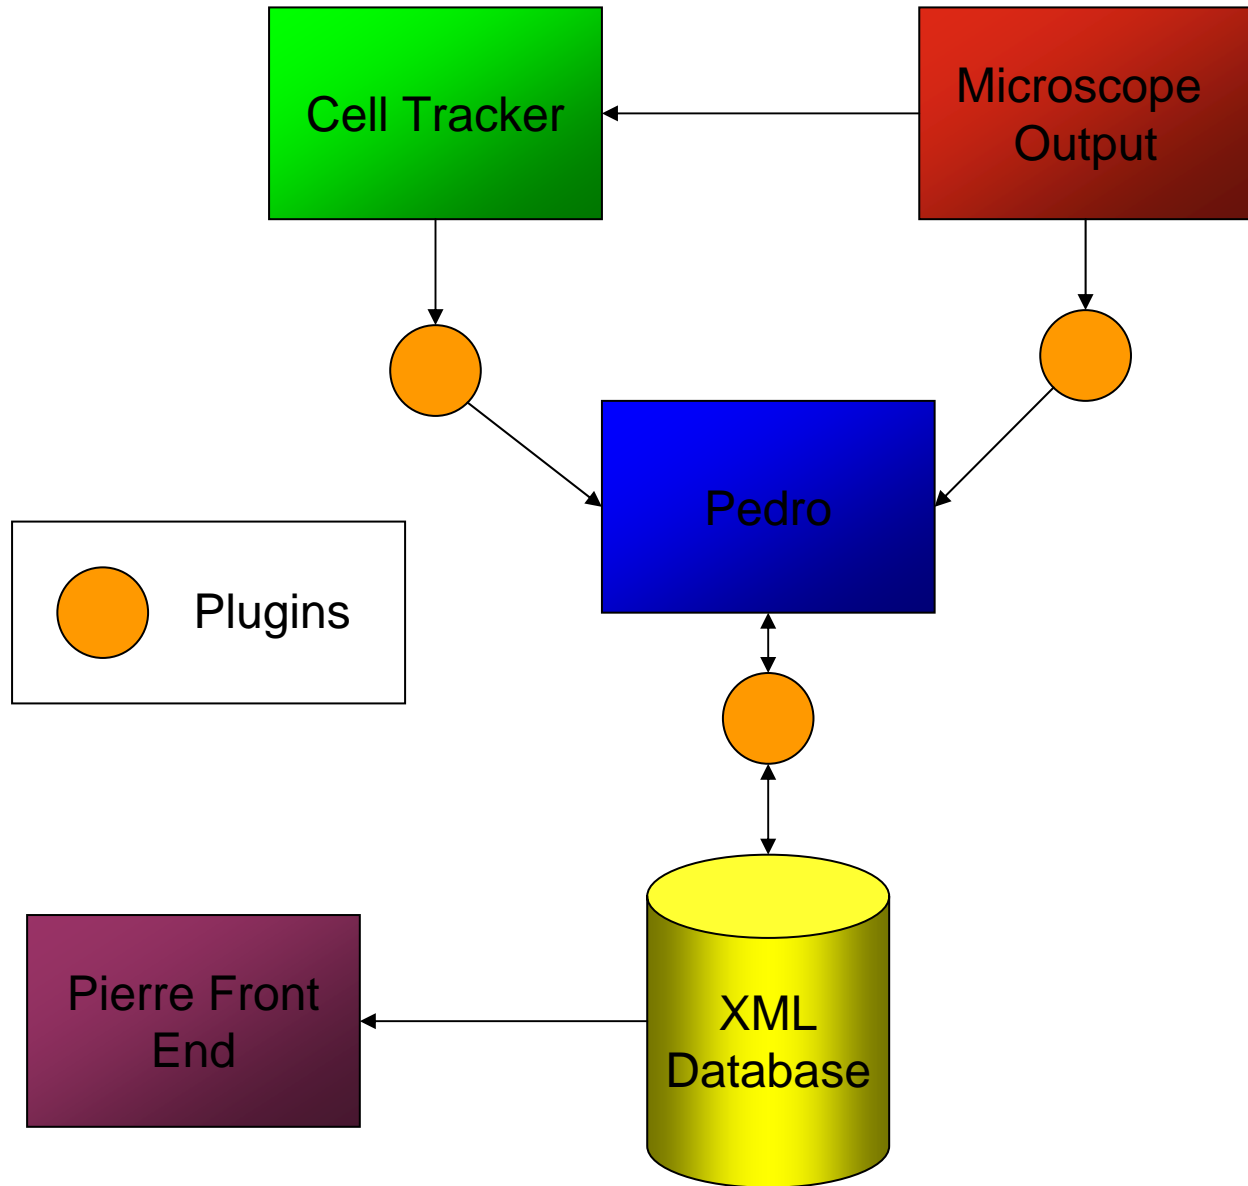

Supplement: 12859_2007_2168_MOESM7_ESM.pdf [file 12859_2007_2168_MOESM7_ESM.pdf]
